# Fetal gut colonization: meconium does not have a detectable microbiota before birth

Katherine M. Kennedy<sup>1,4</sup>, Max J. Gerlach<sup>2</sup>, Thomas Adam<sup>3</sup>, Markus M. Heimesaat<sup>4</sup>, Laura Rossi<sup>5,6</sup>, Michael G. Surette<sup>1,5,6</sup>, Deborah M. Sloboda<sup>1,6,7\*</sup> and Thorsten Braun<sup>2\*</sup>

<sup>1</sup>Department of Biochemistry and Biomedical Sciences, McMaster University, Hamilton, Canada

<sup>2</sup>Charité – Universitätsmedizin Berlin, corporate member of Freie Universität Berlin, Humboldt-Universität zu Berlin, and Berlin Institute of Health, Department of Obstetrics and Department of 'Experimental Obstetrics', Berlin, Germany

<sup>3</sup>Labor Berlin, Charité Vivantes GmbH, Berlin, Germany

<sup>4</sup>Charité – Universitätsmedizin Berlin, corporate member of Freie Universität Berlin, Humboldt-Universität zu Berlin, and Berlin Institute of Health, Institute for Microbiology, Infectious Diseases and Immunology, Berlin, Germany

<sup>5</sup>Department of Medicine, McMaster University, Hamilton, Canada.

<sup>6</sup>Farncombe Family Digestive Health Research Institute, McMaster University, Hamilton, Canada

<sup>7</sup>Department of Pediatrics, McMaster University, Hamilton, Canada.

\*shared senior authorship

## Corresponding Authors

D. M. Sloboda  
McMaster University  
Department of Biochemistry and Biomedical Sciences  
1280 Main St West, Hamilton, Canada  
Tel: +1-905-525-9140  
Fax: +1-905-522-9033  
Email: [sloboda@mcmaster.ca](mailto:sloboda@mcmaster.ca)

T. Braun  
Charité – University Medicine Berlin  
Departments of Obstetrics and Division of Experimental Obstetrics  
Charité Campus Virchow, Berlin  
Germany  
Tel: +49-30-664309  
Fax: +49-30-564901  
Email: [thorsten.braun@charite.de](mailto:thorsten.braun@charite.de)

## Abstract

1 Microbial colonization of the human intestine impacts host metabolism and immunity, however when  
2 colonization occurs is unclear. Although numerous studies have reported bacterial DNA in first-pass  
3 meconium samples, these samples are collected hours to days after birth. We investigated whether  
4 bacteria could be detected in meconium prior to birth. Fetal meconium (n = 20) was collected by rectal  
5 swab during elective breech Cesarean sections without labour prior to antibiotics and compared to  
6 technical and procedural controls (n = 5), first-pass meconium (neonatal meconium; n = 14), and infant  
7 stool (n = 25). Unlike first-pass meconium, no microbial signal distinct from negative controls was  
8 detected in fetal meconium by 16S rRNA gene sequencing. Additionally, positive aerobic (n = 10 of 20)  
9 and anaerobic (n = 12 of 20) clinical cultures of fetal meconium (13 of 20 samples positive in at least one  
10 culture) were identified as likely skin contaminants, most frequently *Staphylococcus epidermidis*, and not  
11 detected by sequencing in most samples (same genera detected by culture and sequencing in 2 of 13  
12 samples with positive culture). We conclude that fetal gut colonization does not occur before birth, and  
13 that microbial profiles of neonatal meconium reflect populations acquired during and after birth.

## 14 Introduction

15 Microbial colonization of the human intestine is a key developmental process as the order and timing of  
16 microbial exposures shape the development of the gut microbiome<sup>1</sup> and impact host metabolism and  
17 immunity later in life.<sup>2</sup> In humans, maturation of intestinal barrier function and immunity both occur  
18 prenatally.<sup>3</sup> The fetal intestine is more permeable to macromolecules<sup>4</sup> and less tolerant of antigens<sup>5</sup> than  
19 that of term infants. Transfer of maternal IgG across the placenta and uptake in the fetal intestine increase  
20 near term gestation,<sup>6</sup> shaping neonatal gut immune responses after birth.<sup>7</sup> Thus the intrauterine  
21 environment has the capacity to shape health well beyond fetal life, and can influence long term health  
22 trajectories,<sup>8</sup> and recently it has been suggested that early-life colonization with specific microbes can

23 predict health outcomes including asthma<sup>9</sup> and obesity.<sup>10</sup> To understand the mechanisms by which  
24 microbial colonization influences health later in life we must know when colonization occurs. Several  
25 groups using sequencing-based methods have reported bacterial DNA in the placenta<sup>11,12</sup> and amniotic  
26 fluid<sup>13</sup> and have suggested that this reflects microbial populations that initiate gut colonization *in utero*.<sup>14</sup>  
27 However, recent studies accounting for the high risk of contamination in low-biomass samples<sup>15</sup> have  
28 failed to detect a placental<sup>16–18</sup> or amniotic fluid microbiome.<sup>19–21</sup> Thus, this issue remains highly  
29 controversial.

30 As neonatal (“first-pass”) meconium is formed prior to birth, it has been used as a proxy for the *in utero*  
31 environment,<sup>22,23</sup> but this does not account for microbial acquisition that occurs during and/or  
32 immediately after birth. Recent metagenomic evidence<sup>24</sup> and previous culture data<sup>25</sup> show a correlation  
33 between the time from birth to collection and bacterial detection in neonatal meconium. Only one  
34 previous study has evaluated the presence of microbes in fetal meconium prior to birth,<sup>26</sup> and found that at  
35 mid-gestation the majority of fetal meconium bacterial profiles did not differ from procedural and kidney  
36 controls.<sup>26</sup> Those that did differ were dominated by *Micrococcus* and *Lactobacillus* species, likely  
37 originating from the maternal cervicovaginal microbiota during sample collection.<sup>27</sup> Here, we  
38 characterized the bacterial profiles of human fetal meconium prior to birth. We show that unlike neonatal  
39 meconium, fetal meconium is indistinguishable from negative controls, indicating that colonization of the  
40 human gut likely does not occur prior to birth. These data significantly extend our understanding of the  
41 establishment of our intestinal microbiome and shed light on which early life influencers may impact  
42 postnatal gut health.

## 43 Results

### 44 Participant characteristics

45 To investigate the possible colonization of the fetal gastrointestinal tract *in utero*, we analyzed meconium  
46 samples collected from 20 term fetuses during caesarean section prior to birth after an intensive method  
47 establishment (Table 1). Fetal meconium was sampled by rectal swabbing during elective caesarean  
48 section deliveries with no signs of labour, preterm labour, or rupture of membranes to prevent vertical  
49 transmission during labour (Fig. 1; Supplementary Fig. 1). As others have previously detected a  
50 microbiome in first-pass (neonatal) meconium,<sup>2,22</sup> we also included neonatal meconium from term  
51 deliveries and infant stool samples collected at 6 months of age as positive controls. We included multiple  
52 negative controls: a swab exposed to operating room air during caesarean delivery (sampling negative –  
53 collected in triplicate for sequencing and cultures during collection of M213), genomic prep reagents  
54 either exposed to PCR hood air during sample preparation or not exposed (extraction negatives), and V3-  
55 V4 PCR amplifications without added template DNA (PCR negative).

56 Fetal and neonatal participants did not differ significantly in maternal age or birth weight. The gestational  
57 age of fetal participants at birth was less than that of neonatal participants ( $p=0.0010$ ; Welch's t-test),  
58 likely due to differences in mode of delivery ( $p=0.00029$ ,  $\chi$ -squared).

### 59 Clinical culture results

60 Fetal meconium samples and the sampling negative control were cultured under both aerobic and  
61 anaerobic conditions (Table 2). Of the 20 fetal meconium samples, 7 were negative for both aerobic and  
62 anaerobic cultures after 120 hours, as was the sampling negative control. Additionally, 3 samples had  
63 negative aerobic cultures but positive anaerobic cultures (M208, *Staphylococcus epidermidis*; M210,

64 *Propionibacterium acnes*; M217, *Propionibacterium acnes*) and 1 sample had a negative anaerobic  
65 culture but positive aerobic culture (M219, *Staphylococcus epidermidis*). Despite growth of  
66 *Staphylococcus epidermidis* under both aerobic and anaerobic conditions only 3 meconium samples had  
67 positive cultures under both conditions, while 5 had positive cultures under only one. As  
68 *Propionibacterium acnes* and coagulase-negative Staphylococci are common skin contaminants in  
69 clinical cultures, we attempted to confirm positive results in sequencing data.

## 70 16S rRNA marker gene sequencing

71 We assessed bacterial DNA present in samples using 16S rRNA gene sequencing of combined variable 3  
72 and 4 region (V3V4) amplicons from 30 cycles of PCR amplification. All meconium samples and  
73 negative controls were additionally sequenced after 40 PCR cycles to confirm the presence of any genera  
74 detected at 30 cycles. We first looked at the number of amplicons sequenced in each sample (read count).  
75 Fetal meconium samples were dominated by host-associated reads before removal of host-associated taxa  
76 (pruning) (median read count of 109.5; min = 23; max = 1316; n=20), after which they had a median read  
77 count of 76.5 (min = 16, max = 202, n=20). Read counts of neonatal meconium samples were much more  
78 variable: two samples did not have any reads, and the remaining samples had a median read count of 130  
79 (min = 4, max = 63079, n=12) before pruning and a median read count of 191 after (min = 9, max =  
80 63079, n=11). Negative controls had a median of 74 reads (min = 6, max = 396) before pruning and a  
81 median of 46 reads after (min = 6, max = 99). As expected, infant stool samples had much higher read  
82 counts than other samples (median read count of 53207; min = 5505; max = 105212; n = 25) before and  
83 after pruning.

84 Looking at within-sample diversity, fetal meconium had lower alpha diversity (Observed ASVs, Shannon  
85 index, Simpson's index, Fig. 2A) than infant stool ( $p = 0.0016$ ,  $p = 0.0001$ , and  $p = 0.0086$  respectively).  
86 Neonatal meconium alpha diversity did not differ from that of infant stool ( $p = 0.7503$ ,  $p = 0.6401$ , and  $p$   
87  $= 0.7762$  respectively). To investigate differences in overall community composition between samples

88 (beta-diversity) we performed principal coordinate analysis (PCoA) of Bray-Curtis dissimilarity and  
89 found fetal meconium samples cluster with negative controls, while neonatal meconium samples were  
90 more variable and more similar to infant stool samples (Fig. 2B). Overall beta-diversity of fetal  
91 meconium was indistinguishable from that of negative controls (Fig. 2C) as Bray-Curtis dissimilarity  
92 between samples was similar within negative controls, within fetal meconium, and between negative  
93 controls and fetal meconium. Compared to fetal meconium, neonatal meconium was more dissimilar to  
94 negative controls ( $p < 0.001$ ).

95 The most prevalent genera detected in fetal meconium samples were *Halomonas* (20/20 samples),  
96 *Rhodanobacter* (19/20, only detected in 1 of 2 sequencing runs for 4 samples), and *Pseudomonas* (15/20,  
97 only detected in 1 of 2 sequencing runs for 6 samples), all of which were also detected in negative  
98 controls (Fig. 3). The only genera detected in more than one fetal meconium sample and not detected in  
99 negative controls were *Bacteroides* (4/20 samples, only detected in 1 of 2 sequencing runs for 2 samples)  
100 and *Staphylococcus* (4/20 samples, only detected in 1 of 2 sequencing runs for 2 samples). *Bacteroides*  
101 was only consistently detected across sequencing runs and with both 30 and 40 cycles of amplification in  
102 1 of 20 samples (M202; Supplementary Fig. 2). *Staphylococcus* was not consistently detected with both  
103 30 and 40 cycles of PCR amplification in any sample and was only detected by sequencing in 2 of 11  
104 samples with positive *Staphylococcus* culture results (M201 positive for *S. epidermidis* and M207 for  
105 both *S. epidermidis* and *S. lugdunensis*). The only other genus consistently detected in a sample with both  
106 30 and 40 cycles of amplification and across sequencing runs was *Escherichia/Shigella* (M202, M203,  
107 M207) which was also detected in an extraction negative control (Supplementary Fig. 2). Despite culture  
108 results positive for *Propionibacterium* species, no members of this genus were detected in sequencing  
109 data from any fetal meconium sample.

## 110 Discussion

111 The role of the microbiome in controlling host metabolism and its relationship to metabolic dysfunction  
112 and obesity<sup>28</sup> has led investigators to question whether our microbial signatures early in life could be used  
113 to predict chronic disease risk.<sup>29</sup> Because of this, how early in life host-microbe interactions are  
114 established has become a topic of intense investigation. In neonates, several microbial species are known  
115 to regulate intestinal function<sup>30</sup> and are key in immune development.<sup>31</sup> Recent studies reporting  
116 colonization may be initiated *in utero*<sup>11,12,14</sup> have been the subject of vigorous debate and have been  
117 criticized for potential contamination.<sup>16,17,21</sup> Despite our extensive sample collection optimization to  
118 reduce potential contamination (see Methods and Supplementary Fig. 1) more than half of fetal  
119 meconium samples had at least one culture test positive for a likely skin contaminant (22/40 total  
120 cultures), highlighting the difficulty in avoiding contamination in these types of studies. Contaminating  
121 bacteria or bacterial DNA may be introduced by maternal skin or blood during sampling, the environment  
122 or investigators during sample handling and culturing, or reagents during DNA extraction and PCR.  
123 Negative controls are therefore necessary at each of these stages to rule out contamination. We analyzed  
124 fetal meconium collected immediately prior to birth, and compared term fetal meconium to appropriate  
125 negative controls,<sup>32</sup> to neonatal meconium and to infant stool samples. This was a particular strength of  
126 our study. Additionally, we used a combination of clinical culture and 16S rRNA gene sequencing to  
127 identify a fetal microbial signature. Despite all efforts, we were unable to detect a microbial signature in  
128 fetal meconium that was distinct from negative controls. Overall, the lack of a consistent bacterial signal  
129 in our data indicates that fetal meconium does not have a microbiome prior to birth.

130 Staphylococci were the dominant genus in culture results (17 cultures) and *S. epidermidis* was the most  
131 prevalent species (11 cultures). In our pilot cohort postoperative swabs of maternal skin around the  
132 incision were also positive for *S. epidermidis*. While it is not possible to know if positive cultures were  
133 the result of contamination by skin microbes, the absence of cultured genera in sequencing data make this

134 a likely possibility. Although *S. epidermidis* DNA has also been reported in amniotic fluid<sup>14</sup> and neonatal  
135 meconium,<sup>24</sup> it is most frequently associated with the skin microbiota<sup>33</sup> suggesting that despite especially  
136 stringent efforts to control for contamination some element of contamination may always exist with  
137 current technologies and protocols. This makes the strong case for ensuring that a robust set of controls  
138 are in place when performing these types of investigations.

139 Although sequencing cannot prove the absence of bacterial DNA in a sample, we used robust negative  
140 controls and technical replicates to distinguish contamination signals from stochastic sequencing noise.  
141 While previous studies have reported the existence of bacterial DNA in amniotic fluid and the placenta,  
142 these studies lacked sequencing data from negative controls and therefore cannot rule out  
143 contamination.<sup>15</sup> In our study, we included negative controls collected during sampling, extraction, and  
144 PCR amplification. Inclusion of these negative controls allowed us to identify the most prevalent and  
145 abundant genera as likely contaminants introduced during extraction (*Halomonas* and *Rhodanobacter*) or  
146 sampling (*Pseudomonas*). Additionally, we included neonatal meconium as a positive control of our  
147 extraction and amplification of bacterial DNA from these low-biomass samples.

148 Even when sequencing data from appropriate negative controls are included, low-biomass samples are  
149 especially sensitive to stochastic amplification<sup>34</sup> and sequencing<sup>32</sup> noise. Determination of a true bacterial  
150 signal requires its presence across technical replicates. In this study, we ran the PCR products of each  
151 amplification on two separate sequencing runs. Excluding likely contaminants, almost all genera detected  
152 were only found in one of two sequencing runs for each sample. *Bacteroides* was the only genus  
153 consistently detected across technical replicates, and this was only true in 1 of 20 fetal meconium  
154 samples. Thus, when comparing across sequencing runs, we found that the bacterial signals in fetal  
155 meconium that are not also detected in negative controls are likely due to stochastic sequencing noise.

156 In terms of overall community composition, fetal meconium beta-diversity was similar to that of negative  
157 controls and lower than that of neonatal meconium. Neonatal meconium community composition was



158 highly variable with some samples more closely resembling infant stool. Thus, microbial profiles of  
159 neonatal meconium reflect populations acquired during and after birth and not populations that exist prior  
160 to birth.

161 To our knowledge, this is the first study to investigate the meconium microbiome in term human neonates  
162 prior to birth and this is also the first study to control for both contamination during sampling and DNA  
163 extraction and stochastic noise during sequencing. While it is not possible to prove the absence of bacteria  
164 in fetal meconium prior to birth, our data do not support *in utero* colonization. These data suggest that  
165 colonization more likely occurs either during birth via maternal skin/vaginal/fecal seeding, or post birth  
166 via environmental seeding.

## 167 Methods

### 168 Study design and sample collection

#### 169 Implementation phase

170 A pilot cohort of 22 participants was recruited to optimize sample collection methods to minimize risk of  
171 contamination and comprised two pilot cohorts as described below (Pilot 1a and 1b). Only caesarean  
172 deliveries were included to avoid the vertical transmission of bacteria during a vaginal birth, during which  
173 the child is exposed to the maternal bacterial flora. In addition to the duration of the birth process itself, a  
174 further disadvantage of spontaneous delivery is the variable time within which the newborn engages its  
175 first bowel movement (neonatal meconium - which is of prenatal origin). Study inclusion was further  
176 restricted to elective caesarean sections prior to labour due to potential microbial influences on unplanned  
177 section deliveries and to guarantee the presence of an operator familiar with the study protocol and an  
178 equally trained research personnel who was able to carry out the immediate transport and further

179 processing of the sample in the nearby laboratory. Breech presentations were preferred to ensure that the  
180 rectum was immediately accessible for sampling after sectioning and before delivery and to minimize  
181 manipulation of the child before sampling (Fig. 1). This ensured a reduced risk of contamination as a  
182 swab could be taken before the neonate was fully removed from the uterus. Finally, to avoid false-  
183 negative results the preoperative prophylactic antibiotic was administered after meconium sample  
184 collection.

### 185 Pilot cohort 1a (establishment of sampling procedures)

186 Swabs with nylon flock fiber (eSwab™, Copan Diagnostics Inc.) were used to collect fetal meconium  
187 samples. In the event of a meconium leakage (spontaneous as a side effect of breech presentation), a  
188 sample was either taken up with a swab, or a careful rectal smear was performed. Pilot samples were  
189 transferred to blood culture bottles (BD BACTEC™) and brought to the Charité University Berlin  
190 laboratory for culturing. The inoculation of the blood culture bottles was initially not carried out under  
191 sterile conditions, but the use of a sterile workbench was quickly considered and tested (from #4 onward,  
192 not continuously). An amniotic fluid sample (#9) and fetal perianal swabs (#6, #7) were also cultured to  
193 identify possible sources of contamination. The Head of Clinical Microbiology from Labor Berlin was  
194 consulted for an external review of the study design and protocol. Of the 16 pilot meconium cultures (8  
195 aerobic + 8 anaerobic), 11 showed bacterial detection (68.8%), 2 of which were more than one species  
196 (#2, #10). Only 1 of the 8 pilot samples (#5) had both anaerobic and aerobic negative cultures (12.5%), 3  
197 cases (#2, #6, #8) had only anaerobic positive cultures (37.5%) and 4 cases (#3, #4, #7, #10) had both  
198 anaerobic and aerobic positive cultures (50%). Positive cultures had a median incubation time of 20 hours  
199 until detection. The 13 detected microbial populations could be assigned to the following species in  
200 decreasing frequency: *Staphylococcus epidermidis* (5), *Staphylococcus lugdunensis* (3), *Staphylococcus*  
201 *capitis* (2), *Staphylococcus caprae*, *Propionibacterium acnes*, *Propionibacterium avidum* (1 each). The  
202 amniotic fluid sample showed no contamination. *Staphylococcus epidermidis* (both anaerobic and

203 aerobic, #7), *Enterobacter aerogenes* (anaerobic, #6), and *Staphylococcus lugdunensis* (aerobic, #6) were  
204 detected in perianal swabs. Maternal skin was considered as the potential source of contamination, and  
205 therefore a second pilot study was performed to minimize skin contamination during sampling.

## 206 Pilot cohort 1b (#11 - #22)

207 To investigate maternal skin as a potential source of contamination, we cultured a set of pilot swabs of  
208 maternal skin around the caesarean section area both preoperatively after disinfection and postoperatively  
209 after the end of wound care (#11). These samples were collected and cultured as above in pilot 1a.  
210 Anaerobic preoperative swab cultures were positive for *Staphylococcus lugdenensis*, *Bacillus*  
211 *licheniformis*, and *Clostridium perfringens*. Postoperative swab cultures were positive for *Staphylococcus*  
212 *epidermidis* (both anaerobic and aerobic) and *Bacillus licheniformis* (anaerobic) and *Staphylococcus*  
213 *lugdunensis* (aerobic). To reduce contamination from maternal skin microbes, we expanded the area of  
214 disinfection with Softasept<sup>R</sup> N coloured from the maternal armpits to her knees. To reduce the chance of  
215 contamination due to amniotic fluid dampening the surgical draping, a new model of draping was  
216 designed and used (from #15 on) that had a wider design, better adhesive properties, and a thinner film.  
217 The thinner film helped in cases where the mother had repeated caesarean sections, where the prior model  
218 sometimes required the film to be slit to visualize the existing scar. The film of the new perforated sheet  
219 remained intact and the aseptic area remained undisturbed up to the skin incision. Lateral drapes were  
220 also introduced (from #16 on) and the remaining pilot samples were used to observe the resistance of the  
221 seal, to identify possible points susceptible to film detachments (#17 - #22).

## 222 Principal Study cohort

223 Participants (n=19 mothers) were recruited during routine antenatal counselling when patients presented  
224 with planned caesarean section and breech presentation at 36+0 weeks gestation. The study protocol was

225 reviewed and approved by Charité ethics committee (EA 04/059/16). Informed consent was obtained  
226 from all study participants.

227 Advanced physical disinfection of maternal skin was performed (as described in pilot 1b), covering the  
228 area from maternal armpits to knees and the surgical area was covered using the specialized sterile drape,  
229 with film remaining intact until the incision. After caesarean section and exposure of the fetal buttocks  
230 prior to birth, meconium was rectally sampled using sterile eSwabs™. At least one operating room  
231 negative control (swab exposed to operating room air) was also taken. Triplicate samples were collected,  
232 of which two were immediately cultured (anaerobic and aerobic) and one was flash frozen in liquid  
233 nitrogen for future sequencing.

## 234 Neonatal meconium and infant stool sample collection

235 Neonatal meconium and infant stool samples used as positive controls were collected as part of a separate  
236 study (unpublished). Neonatal meconium samples were collected from diapers within 48 hours of birth  
237 and frozen at -80°C prior to processing for sequencing. Infant stool samples were collected at 6 months of  
238 age by parents and frozen at -20°C before being stored at -80°C prior to processing for sequencing.  
239 Neonatal meconium and infant stool samples were not included in bacterial culturing.

## 240 Bacterial culturing

241 Samples were transferred in a sterile hood to anaerobic and aerobic point bottles (BD Bactec system™)  
242 and supplemented (BD BACTEC™ FOS™) to improve the growth conditions for more demanding  
243 bacterial species. Cultures were maintained for a maximum of 120 hours. Positive cultures were sub-  
244 cultured on agar plates and identified using MALDI-TOF (VitekMS, bioMérieux).

## 245 DNA extraction and amplification

246 Sample aliquots were transferred to genomic prep tubes in a sterile PCR hood using sterile biopsy  
247 punches and gloves were changed between handling each sample. In addition to the sampling negative  
248 control collected in the operating room, an extraction negative control (opened prep tube in the PCR hood  
249 during sample aliquoting) was included. An additional extraction negative control prep tube remained  
250 closed during sample aliquoting. Genomic DNA was extracted as previously described<sup>35</sup> with the addition  
251 of a mechanical lysis step using 0.2 g of 2.8 mm ceramic beads to improve extraction efficiency and  
252 without mutanolysin. PCR amplification of the variable 3 and 4 (V3-V4) regions of the 16S rRNA gene  
253 was subsequently performed on the extracted DNA from each sample using methods previously  
254 described.<sup>36</sup> In addition to the typical 30 cycles of amplification, each sample was also independently  
255 amplified for 40 cycles to confirm any signals detected—these additional amplifications were not used for  
256 general analysis as amplification beyond 30 cycles is known to bias sequencing data.<sup>37</sup> Each reaction  
257 contained 5 pmol of primer (341F – CCTACGGGNGGCWGCAG, 806R – GGACTACNVGGGTWTC-  
258 TAAT), 200 mM of dNTPs, 1.5 µl 50 mM MgCl<sub>2</sub>, 2 µl of 10 mg/ml bovine serum albumin (irradiated  
259 with a transilluminator to eliminate contaminating DNA) and 0.25 µl Taq polymerase (Life Technologies,  
260 Canada) for a total reaction volume of 50 µl. 341F and 806R rRNA gene primers were modified to  
261 include adapter sequences specific to the Illumina technology and 6-base pair barcodes were used to  
262 allow multiplexing of samples. 16S DNA products of the PCR amplification were subsequently  
263 sequenced twice on two separate runs of the Illumina MiSeq platform (2x300bp) at the Farncombe  
264 Genomics Facility (McMaster University, Hamilton ON, Canada).

## 265 16S rRNA gene sequencing and analysis

266 Primers were trimmed from FASTQ files using Cutadapt<sup>38</sup> (RRID:SCR\_011841) and DADA2<sup>39</sup> was used  
267 to derive amplicon sequence variants (ASVs). Taxonomy was assigned using the Silva 132 reference

268 database.<sup>40</sup> Non-bacterial ASVs were culled (kingdom Eukaryota, family Mitochondria, order  
269 Chloroplast, or no assigned phylum), as was any ASV to which only 1 sequence was assigned.

270 We performed alpha and beta diversity analyses in R using phyloseq<sup>41</sup> (RRID:SCR\_013080) and tested  
271 for whole community differences across groups using vegan's<sup>42</sup> (RRID:SCR\_011950) implementation of  
272 permutational multivariate analysis of variance (PERMANOVA) in the adonis command. These results  
273 were visualized via Principal Coordinate Analysis (PCoA) ordination using R's ggplot2 package  
274 (RRID:SCR\_014601).<sup>43</sup> ASV sequences were aligned using DECIPHER<sup>44</sup> and a GTR+G+I (Generalized  
275 time-reversible with Gamma rate variation) maximum likelihood tree phylogenetic tree was constructed  
276 with phangorn<sup>45</sup> using a neighbor-joining tree as a starting point. Significance of alpha diversity was  
277 analyzed by linear mixed model with sample type as a fixed effect and participant ID as a random effect.  
278 Significance of Bray-Curtis distances between and within sample types was assessed by linear mixed  
279 model with sample type comparison as a fixed effect (i.e. neg-neg, neg-fetal, etc.) and participant ID as a  
280 random effect.

## 281 Data availability

282 All sequencing data associated with this study has been made publicly available. 16S rRNA bacterial  
283 profiling data generated in this study is available in the NCBI Sequence Read Archive under project ID  
284 PRJNA666699.

## 285 References

- 286 1. Sprockett, D., Fukami, T. & Relman, D. A. Role of priority effects in the early-life assembly of the  
287 gut microbiota. *Nat. Rev. Gastroenterol. Hepatol.* **15**, 197–205 (2018).
- 288 2. Durack, J. *et al.* Delayed gut microbiota development in high-risk for asthma infants is temporarily  
289 modifiable by *Lactobacillus* supplementation. *Nat. Commun.* **9**, 707 (2018).
- 290 3. Weström, B., Arévalo Sureda, E., Pierzynowska, K., Pierzynowski, S. G. & Pérez-Cano, F.-J. The  
291 immature gut barrier and its importance in establishing immunity in newborn mammals. *Front.*  
292 *Immunol.* **11**, 1153 (2020).
- 293 4. Axelsson, I. *et al.* Macromolecular absorption in preterm and term infants. *Acta Paediatr. Scand.* **78**,  
294 532–537 (1989).
- 295 5. Nanthakumar, N. *et al.* The mechanism of excessive intestinal inflammation in necrotizing  
296 enterocolitis: an immature innate immune response. *PLoS One* **6**, e17776 (2011).
- 297 6. Chen, K., Magri, G., Grasset, E. K. & Cerutti, A. Rethinking mucosal antibody responses: IgM, IgG  
298 and IgD join IgA. *Nat. Rev. Immunol.* **20**, 427–441 (2020).
- 299 7. Yoshida, M. *et al.* Human neonatal Fc receptor mediates transport of IgG into luminal secretions for  
300 delivery of antigens to mucosal dendritic cells. *Immunity* **20**, 769–783 (2004).
- 301 8. Hanson, M. A. & Gluckman, P. D. Developmental origins of health and disease: new insights. *Basic*  
302 *Clin. Pharmacol. Toxicol.* **102**, 90–93 (2008).
- 303 9. Fujimura, K. E. *et al.* Neonatal gut microbiota associates with childhood multisensitized atopy and T  
304 cell differentiation. *Nat. Med.* **22**, 1187–1191 (2016).
- 305 10. Soderborg, T. K. *et al.* The gut microbiota in infants of obese mothers increases inflammation and  
306 susceptibility to NAFLD. *Nat. Commun.* **9**, 4462 (2018).
- 307 11. Aagaard, K. *et al.* The placenta harbors a unique microbiome. *Sci. Transl. Med.* **6**, 237ra65 (2014).
- 308 12. Antony, K. M. *et al.* The preterm placental microbiome varies in association with excess maternal  
309 gestational weight gain. *Am. J. Obstet. Gynecol.* **212**, 653.e1–16 (2015).

- 310 13. Stinson, L. *et al.* Comparison of Bacterial DNA Profiles in Mid-Trimester Amniotic Fluid Samples  
311 From Preterm and Term Deliveries. *Front. Microbiol.* **11**, 415 (2020).
- 312 14. Collado, M. C., Rautava, S., Aakko, J., Isolauri, E. & Salminen, S. Human gut colonisation may be  
313 initiated in utero by distinct microbial communities in the placenta and amniotic fluid. *Sci. Rep.* **6**,  
314 23129 (2016).
- 315 15. Salter, S. J. *et al.* Reagent and laboratory contamination can critically impact sequence-based  
316 microbiome analyses. *BMC Biol.* **12**, 87 (2014).
- 317 16. Lauder, A. P. *et al.* Comparison of placenta samples with contamination controls does not provide  
318 evidence for a distinct placenta microbiota. *Microbiome* **4**, 29 (2016).
- 319 17. Theis, K. R. *et al.* Does the human placenta delivered at term have a microbiota? Results of  
320 cultivation, quantitative real-time PCR, 16S rRNA gene sequencing, and metagenomics. *Am. J.*  
321 *Obstet. Gynecol.* **220**, 267.e1-267.e39 (2019).
- 322 18. Olomu, I. N. *et al.* Elimination of “kitome” and “splashome” contamination results in lack of  
323 detection of a unique placental microbiome. *BMC Microbiol.* **20**, 157 (2020).
- 324 19. Lim, E. S., Rodriguez, C. & Holtz, L. R. Amniotic fluid from healthy term pregnancies does not  
325 harbor a detectable microbial community. *Microbiome* **6**, 87 (2018).
- 326 20. Rehbinder, E. M. *et al.* Is amniotic fluid of women with uncomplicated term pregnancies free of  
327 bacteria? *Am. J. Obstet. Gynecol.* **219**, 289.e1-289.e12 (2018).
- 328 21. de Goffau, M. C. *et al.* Human placenta has no microbiome but can contain potential pathogens.  
329 *Nature* **572**, 329–334 (2019).
- 330 22. Wang, J. *et al.* Dysbiosis of maternal and neonatal microbiota associated with gestational diabetes  
331 mellitus. *Gut* (2018) doi:10.1136/gutjnl-2018-315988.
- 332 23. Hu, J. *et al.* Diversified microbiota of meconium is affected by maternal diabetes status. *PLoS One* **8**,  
333 e78257 (2013).
- 334 24. Bittinger, K. *et al.* Bacterial colonization reprograms the neonatal gut metabolome. *Nat. Microbiol.*  
335 **5**, 838–847 (2020).



- 336 25. Hall, I. C. Bacterial flora of first specimens of meconium passed by fifty new-born infants. *Arch.*  
337 *Pediatr. Adolesc. Med.* **47**, 1279 (1934).
- 338 26. Rackaityte, E. *et al.* Viable bacterial colonization is highly limited in the human intestine in utero.  
339 *Nat. Med.* (2020) doi:10.1038/s41591-020-0761-3.
- 340 27. Chen, C. *et al.* The microbiota continuum along the female reproductive tract and its relation to  
341 uterine-related diseases. *Nat. Commun.* **8**, 875 (2017).
- 342 28. Moreno-Indias, I., Cardona, F., Tinahones, F. J. & Queipo-Ortuño, M. I. Impact of the gut  
343 microbiota on the development of obesity and type 2 diabetes mellitus. *Front. Microbiol.* **5**, 190  
344 (2014).
- 345 29. Gohir, W., Ratcliffe, E. M. & Sloboda, D. M. Of the bugs that shape us: maternal obesity, the gut  
346 microbiome, and long-term disease risk. *Pediatr. Res.* **77**, 196–204 (2015).
- 347 30. Singer, J. R. *et al.* Preventing dysbiosis of the neonatal mouse intestinal microbiome protects against  
348 late-onset sepsis. *Nat. Med.* **25**, 1772–1782 (2019).
- 349 31. Galazzo, G. *et al.* Development of the Microbiota and Associations With Birth Mode, Diet, and  
350 Atopic Disorders in a Longitudinal Analysis of Stool Samples, Collected From Infancy Through  
351 Early Childhood. *Gastroenterology* (2020) doi:10.1053/j.gastro.2020.01.024.
- 352 32. Erb-Downward, J. R. *et al.* Critical Relevance of Stochastic Effects on Low-Bacterial-Biomass 16S  
353 rRNA Gene Analysis. *MBio* **11**, (2020).
- 354 33. Stacy, A. & Belkaid, Y. Microbial guardians of skin health. *Science* **363**, 227–228 (2019).
- 355 34. Kennedy, K., Hall, M. W., Lynch, M. D. J., Moreno-Hagelsieb, G. & Neufeld, J. D. Evaluating bias  
356 of illumina-based bacterial 16S rRNA gene profiles. *Appl. Environ. Microbiol.* **80**, 5717–5722  
357 (2014).
- 358 35. Whelan, F. J. *et al.* The loss of topography in the microbial communities of the upper respiratory  
359 tract in the elderly. *Ann. Am. Thorac. Soc.* **11**, 513–521 (2014).
- 360 36. Bartram, A. K., Lynch, M. D. J., Stearns, J. C., Moreno-Hagelsieb, G. & Neufeld, J. D. Generation  
361 of multimillion-sequence 16S rRNA gene libraries from complex microbial communities by

- 362 assembling paired-end illumina reads. *Appl. Environ. Microbiol.* **77**, 3846–3852 (2011).
- 363 37. Sze, M. A. & Schloss, P. D. The impact of DNA polymerase and number of rounds of amplification  
364 in PCR on 16S rRNA gene sequence data. *mSphere* **4**, (2019).
- 365 38. Martin, M. Cutadapt removes adapter sequences from high-throughput sequencing reads.  
366 *EMBnet.journal* **17**, 10–12 (2011).
- 367 39. Callahan, B. J. *et al.* DADA2: High-resolution sample inference from Illumina amplicon data. *Nat.*  
368 *Methods* **13**, 581–583 (2016).
- 369 40. Quast, C. *et al.* The SILVA ribosomal RNA gene database project: improved data processing and  
370 web-based tools. *Nucleic Acids Res.* **41**, D590-6 (2013).
- 371 41. McMurdie, P. J. & Holmes, S. phyloseq: an R package for reproducible interactive analysis and  
372 graphics of microbiome census data. *PLoS One* **8**, e61217 (2013).
- 373 42. Oksanen, J. *et al.* Vegan: Community Ecology Package. 2013. R-package version 2.0-10. (2013).
- 374 43. Wickham, H. *ggplot2: Elegant Graphics for Data Analysis*. (Springer, 2016).
- 375 44. Wright, E. S. RNAconTest: comparing tools for noncoding RNA multiple sequence alignment based  
376 on structural consistency. *RNA* **26**, 531–540 (2020).
- 377 45. Schliep, K. P. phangorn: phylogenetic analysis in R. *Bioinformatics* **27**, 592–593 (2011).

## 378 Acknowledgements

379 We thank all the participants that were recruited in this study. We would like to thank Dr. Hanna  
380 Brinkmann, Laura Pasura, Laura Maschirow and Alexander Schwickert for assisting with patient  
381 recruitments; Mrs. Loreen Ehrlich with sample preparation and Dr. Katharina von Weizsaecker for her  
382 external review of the microbiology protocol and advice on protocol improvements. We thank Michelle  
383 Shah for performing genomic DNA extractions. K.M.K. is supported by a Farncombe Digestive Health  
384 Research Institute Student Fellowship. MGS and DMS are supported by the Canada Research Chairs  
385 Program.

## 386 Author Contributions

387 K.M.K. analyzed sequencing data and wrote the manuscript. M.G. contributed to sample collection and  
388 wrote the Study Design and Sample Collection portion of the Methods section. T.A. performed the  
389 culture-based analyses. M.M.H. assisted in study design. L.R. assisted in study design and performed  
390 V3V4 amplifications and processing of raw sequencing data. M.G.S. assisted in study design and analysis  
391 of sequencing data. D.M.S. contributed to data analysis, and manuscript development. T.B. designed the  
392 study and contributed to sample collection. All authors discussed the analyses and results and edited the  
393 manuscript.

## 394 Competing Interests statement

395 The authors declare that they have no competing interests.

## 396 Figure Legends

397 **Figure 1. Diagram of collection method for fetal meconium samples.** Following advanced physical  
398 disinfection of maternal skin from maternal armpits to knees, the surgical area was covered using the  
399 specialized sterile drape, with film remaining intact until the incision. After caesarean section and  
400 exposure of the fetal buttocks prior to birth, meconium was rectally sampled using sterile eSwabs™.

401 **Figure 2. Fetal meconium alpha and beta diversity do not differ from those of sampling negative**  
402 **controls.** a, Boxplots of alpha diversity measures by sample type (negative control (neg, n = 5), fetal  
403 meconium (fetal, n = 20), neonatal meconium (neo, n = 14), and infant stool (inf, n = 25). Significance  
404 assessed by a linear mixed model, with sample type as a fixed effect and participant ID as a random effect  
405 ( $p < 0.05$  indicated by \*). b, Principal coordinate analysis (PCoA) of Bray-Curtis distances at genus level  
406 shows fetal meconium samples (blue dots) cluster with sampling negative controls (red), indicating their  
407 community composition is similar, while neonatal meconium samples (purple) are more variable. c,  
408 Boxplots of Bray-Curtis dissimilarities within (red) and between (black) sample types shows that fetal  
409 meconium samples less dissimilar to each other and similar to negative controls. Significance assessed by  
410 linear mixed model with sample type comparison as a fixed effect (i.e. neg-neg, neg-fetal, etc.) and  
411 participant ID as a random effect. Boxplot center line, median; box limits, upper and lower quartiles;  
412 whiskers, 1.5x interquartile range; points, outliers.

413 **Figure 3. Neighbour-joining phylogenetic tree of all genera and presence/absence in each sample.**  
414 Taxonomy was assigned using the RDP Classifier against the Silva 132 reference database. Dots indicate  
415 presence of the genera at any abundance in the given sample. Gammaproteobacteria prevalent in fetal  
416 meconium (fetal) are also prevalent in sampling and extraction negative controls (neg). Microbial profiles  
417 of first-pass neonatal meconium (neo) share more genera with those of infant stool (inf) than fetal  
418 meconium.

419 **Supplementary Figure 1. Optimization of collection to reduce contamination.**

420 **Supplementary Figure 2. Detection of genera across technical replicates.** The abundance (read count)  
421 is shown for each sample by sequencing run (run 1 and run 2) for 30 cycles of PCR amplification. Genera  
422 are only shown if they were also detected within the same sample's sequencing data from 40 cycles of  
423 PCR amplification.

424 **Tables**

**Table 1. Participant characteristics**

|                                      | Fetal<br>(n = 20) | Neo<br>(n = 14) |
|--------------------------------------|-------------------|-----------------|
| Maternal age, years<br>mean (SD)     | 32.3 (5.1)        | 33.2 (4.4)      |
| Gestational age, days *<br>mean (SD) | 271.4 (5.6)       | 276.7 (6.0)     |
| Birth weight, grams<br>mean (SD)     | 3240 (380)        | 3384 (557)      |
| Sex                                  |                   |                 |
| Female                               | 14 (70)           | 7 (47)          |
| Male                                 | 6 (30)            | 8 (53)          |
| Delivery, n (%) <sup>+</sup>         |                   |                 |
| Vaginal                              | 0 (0)             | 9 (60)          |
| Caesarean                            | 20 (100)          | 8 (40)          |

p < 0.05 indicated by \* (t-test) or <sup>+</sup> Chi-squared

425

**Table 2. Fetal meconium culture results**

| ID     | Anaerobic culture        |                       | Aerobic culture          |                       |
|--------|--------------------------|-----------------------|--------------------------|-----------------------|
|        | Result                   | Incubation Time (hrs) | Result                   | Incubation Time (hrs) |
| M201†  | Staph. epidermidis       | 18.64                 | Staph. epidermidis       | 23.2                  |
| M202   | Staph. epidermidis       | 18.68                 | Staph. lugdunensis       | 20.67                 |
| M203*  | Staph. epidermidis       | 20.12                 | Staph. epidermidis       | 14.92                 |
| M204*† | Staph. epidermidis       | 18.59                 | Staph. epidermidis       | 17.09                 |
| M205†  | negative                 | 120.07                | negative                 | 120.07                |
| M206   | Staph. saprophyticus     | 26.09                 | Staph. saprophyticus     | 17.96                 |
| M207†  | Staph. epidermidis       | 19.06                 | Staph. lugdunensis       | 18.69                 |
| M208   | Staph. epidermidis       | 22.05                 | negative                 | 120.08                |
| M209   | negative                 | 120.07                | negative                 | 120.08                |
| M210   | Propionibacterium acnes  | 79.21                 | negative                 | 120.08                |
| M211   | negative                 | 120.08                | negative                 | 120.09                |
| M212   | Staph. epidermidis       | 19.94                 | Staph. hominis           | 24.29                 |
| M213   | Propionibacterium acnes  | 102.77                | Staph. capitis           | 36.68                 |
| Neg    | negative                 | 102.02                | negative                 | 120.03                |
| M215   | negative                 | 120.13                | negative                 | 120.13                |
| M216   | negative                 | 120.16                | negative                 | 120.15                |
| M217   | Propionibacterium acnes  | 66.24                 | negative                 | 120.17                |
| M219   | negative                 | 120.08                | Staph. epidermidis       | 17.41                 |
| M221   | negative                 | 120.08                | negative                 | 120.08                |
| M222   | negative                 | 120.08                | negative                 | 120.09                |
| M223   | Propionibacterium avidum | 80.85                 | Propionibacterium avidum | 99.05                 |

\* monochorionic-diamniotic twins; † not breech presentation

426

- Expanded area of maternal disinfection
- Specialized surgical drape intact until incision
- Breech caesarean sections minimize manipulation

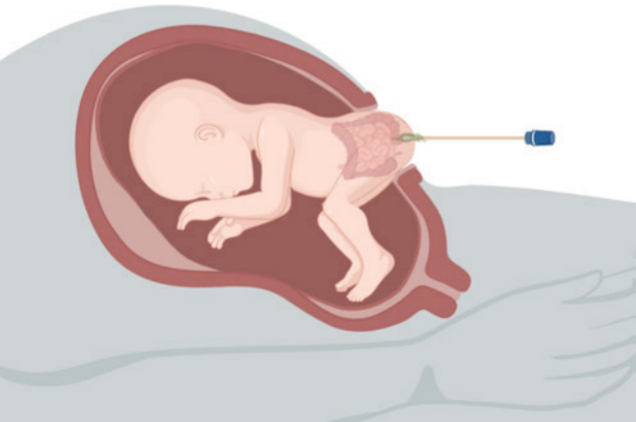

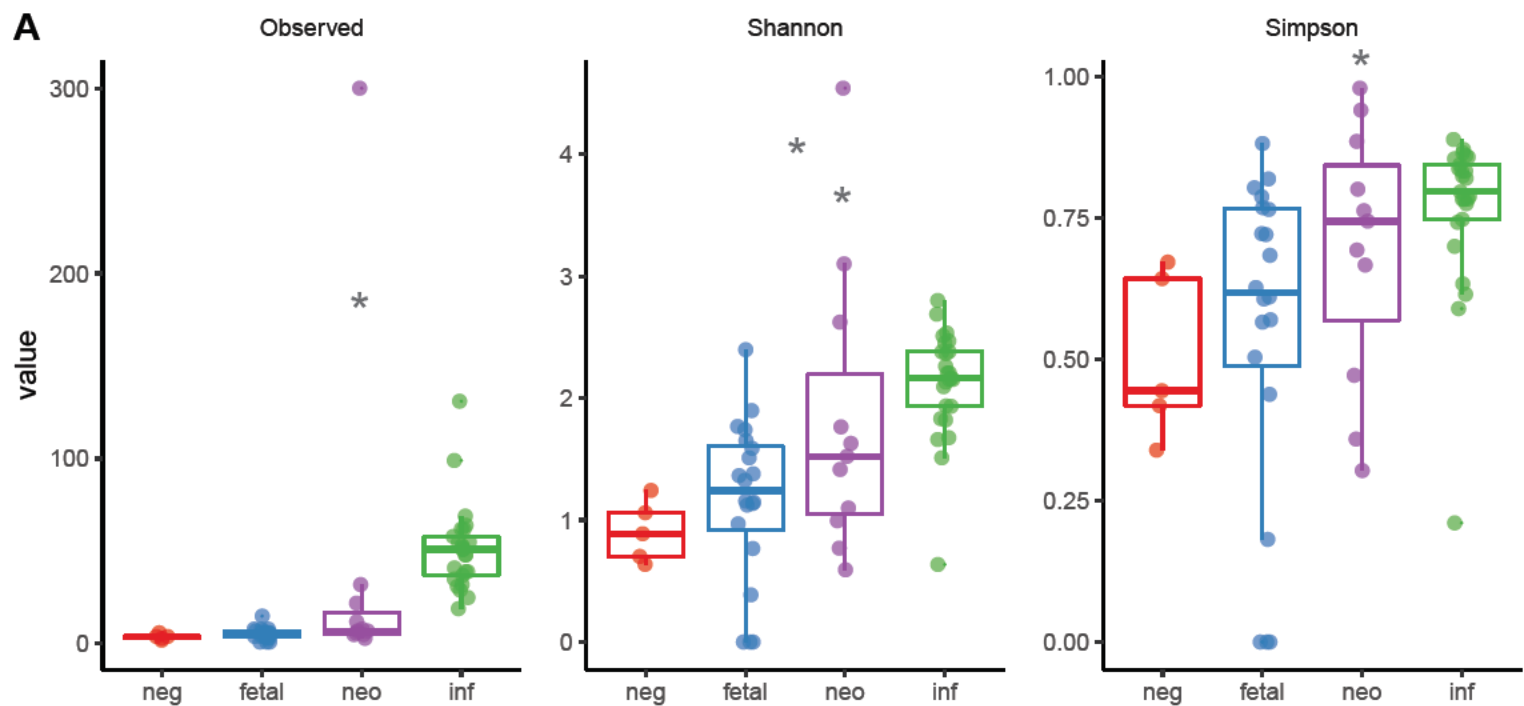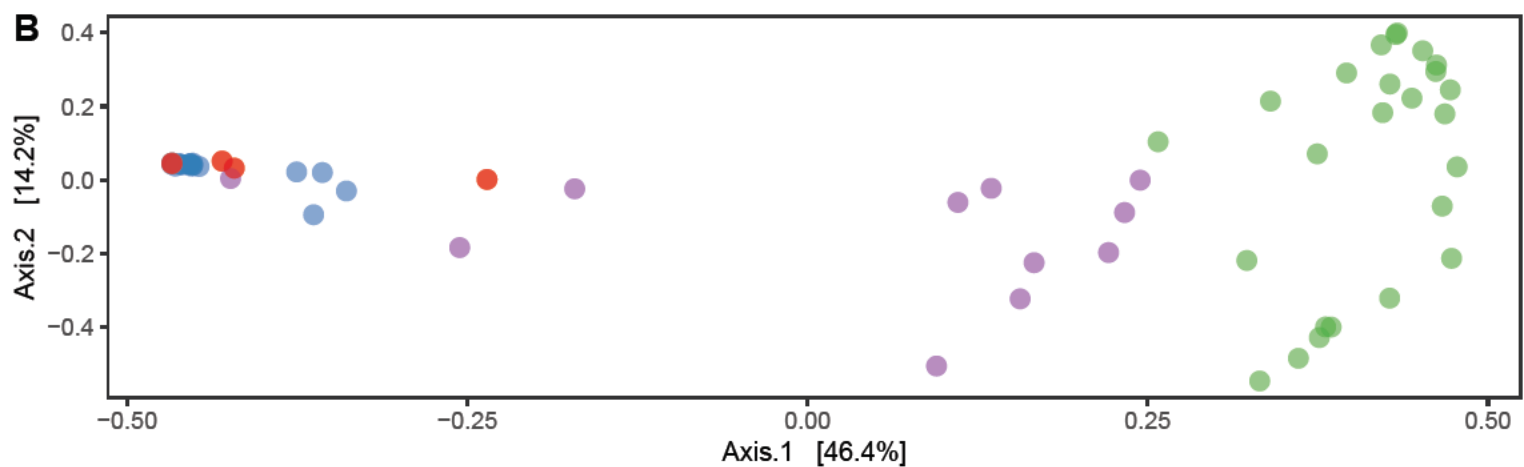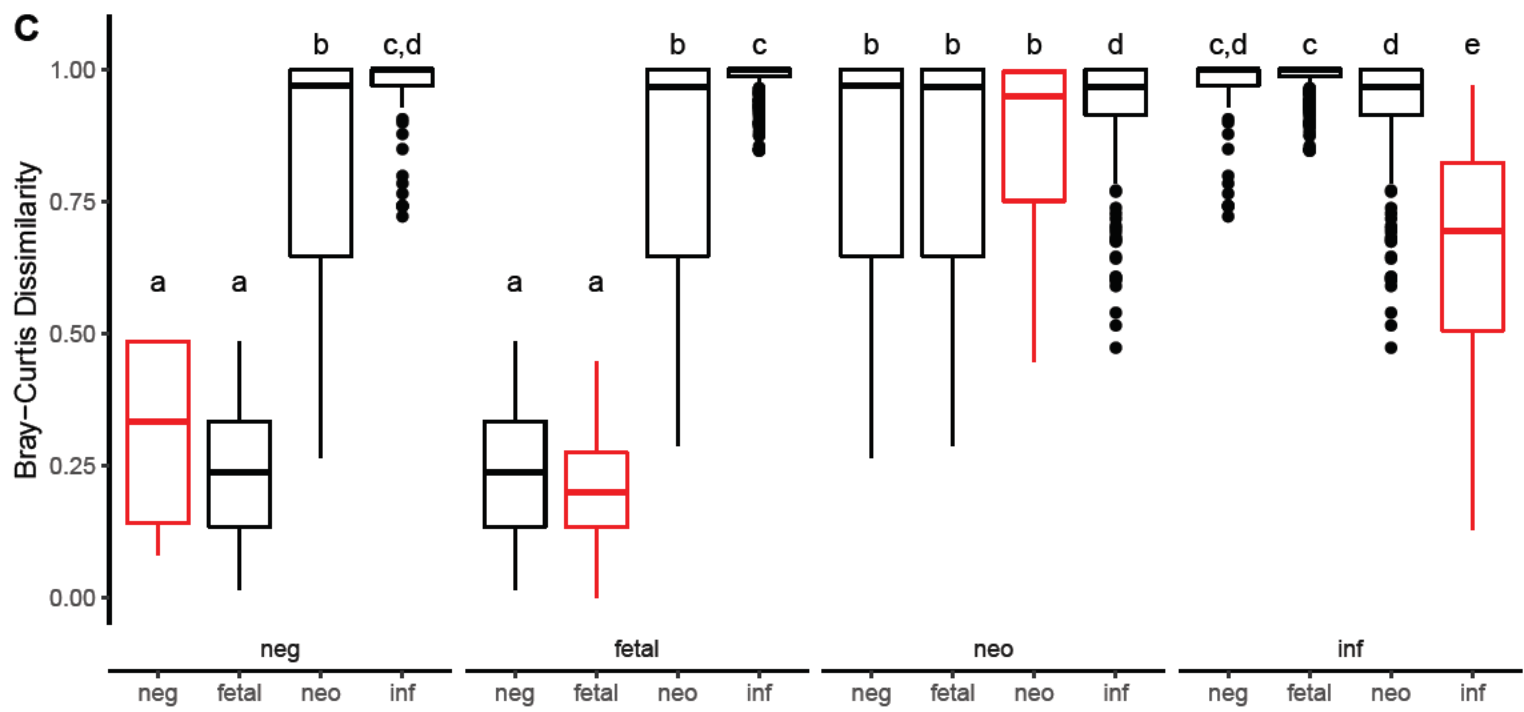

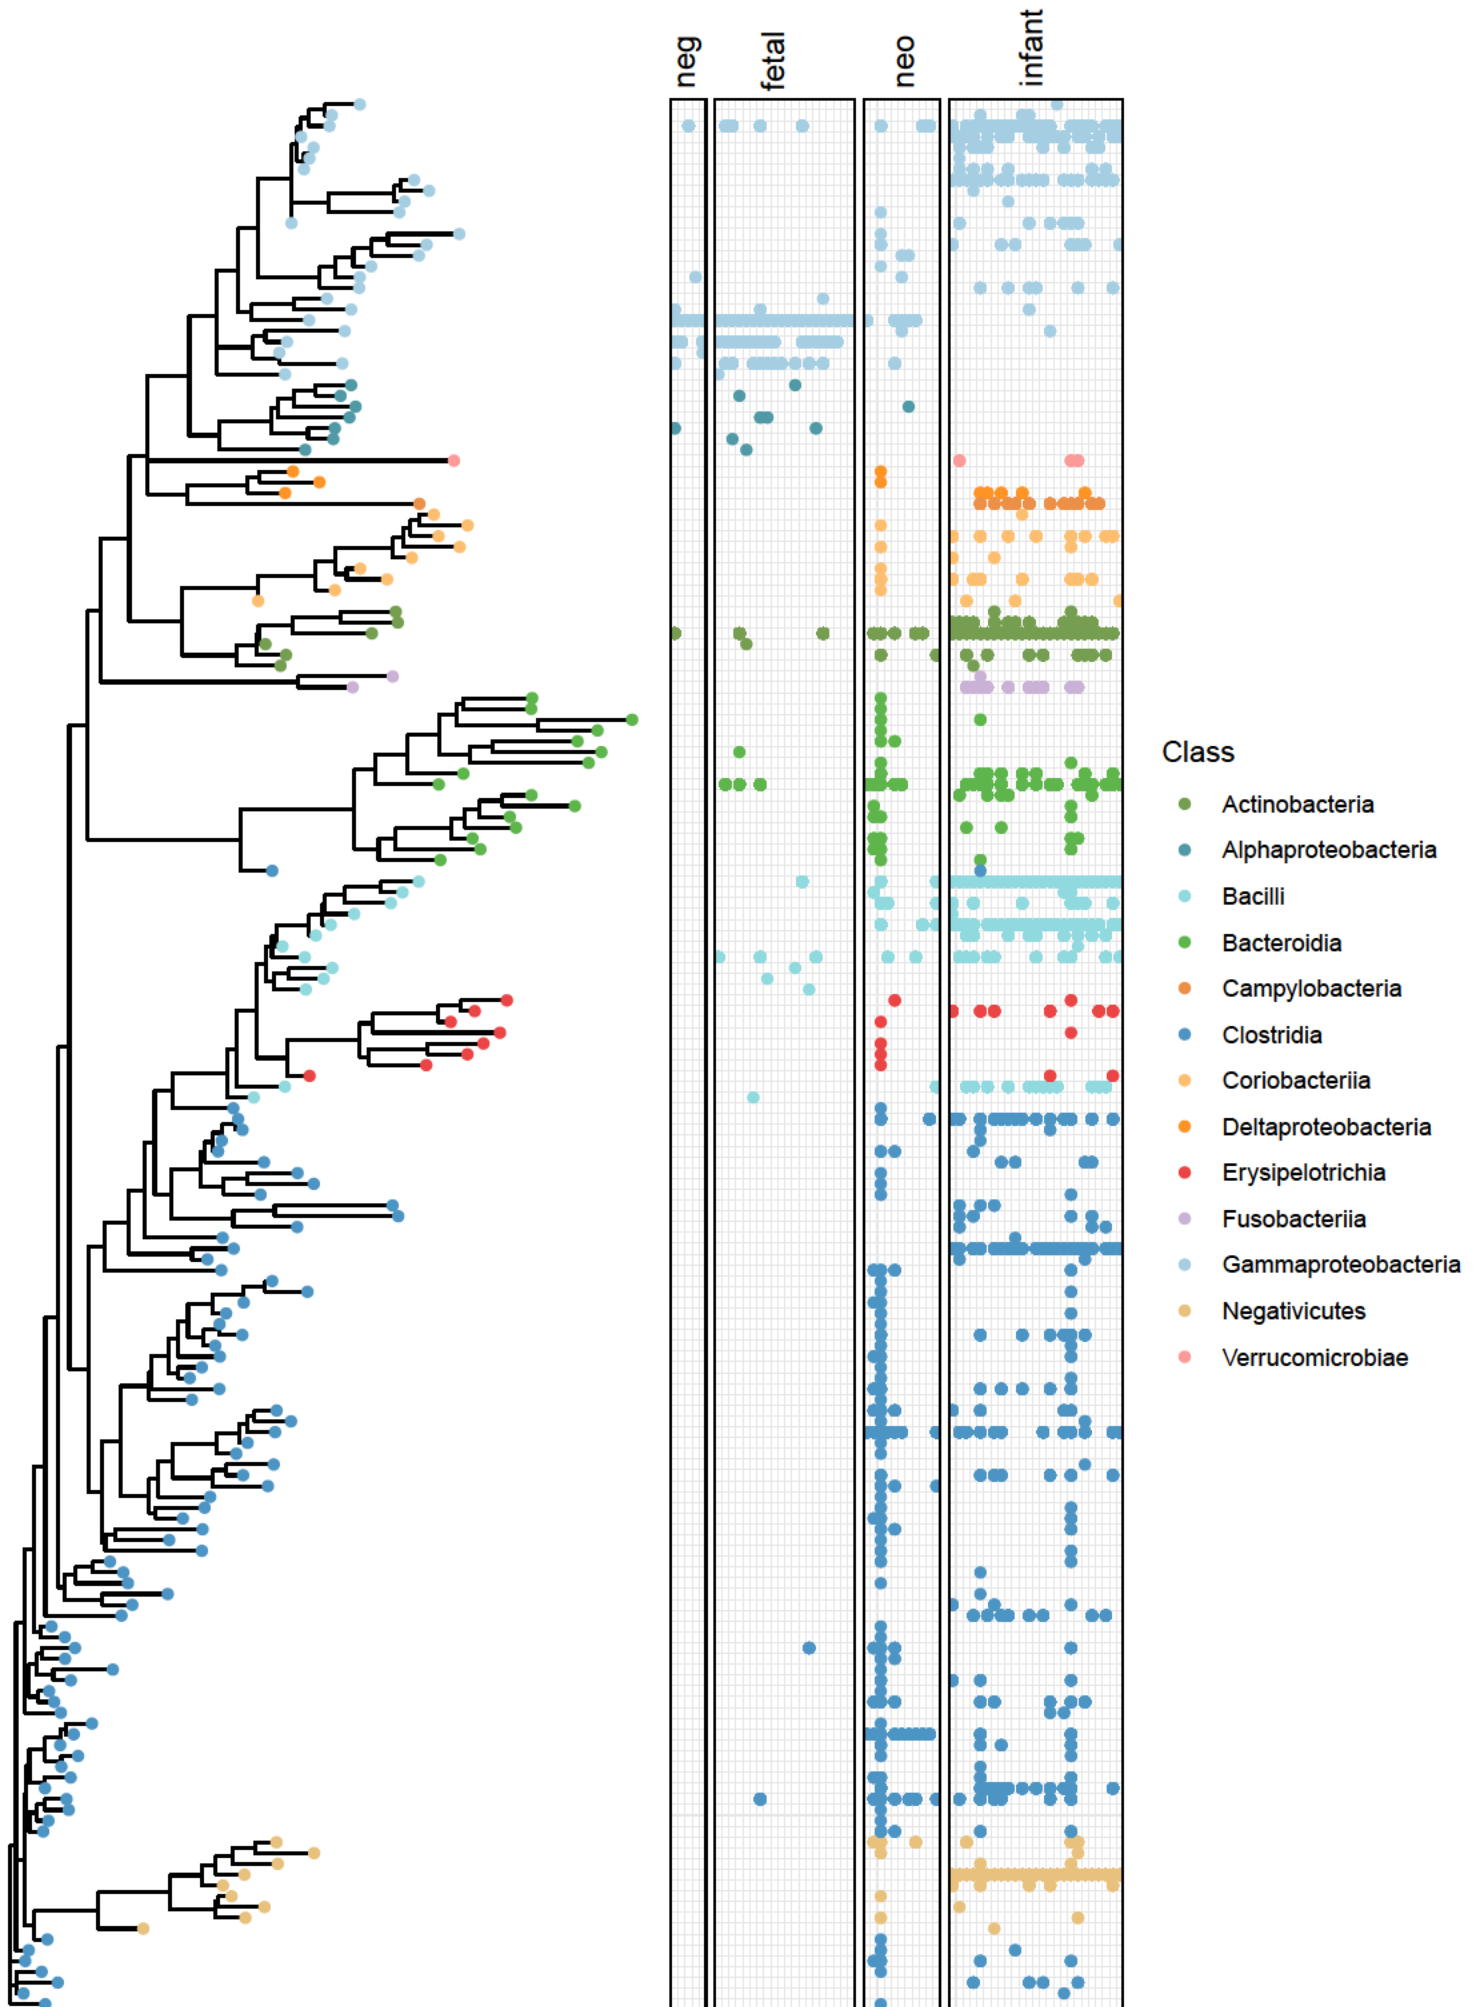



## Birth mode

- Problem: vertical contamination during vaginal delivery ⇒ Solution: caesarean section
- Problem: Infectious etiology in secondary caesarean section ⇒ Solution: primary caesarean section

## Sampling

- Problem: Contamination from manipulation of the child after development ⇒ Solution: breech deliveries
- Problem: contamination of the surgical field ⇒ Solution: extended aseptic area, special ad sheet
- Problem: false-negative results through preoperative antibiotic treatment ⇒ Solution: antibiotic prophylaxis after sampling

## Sample preparation

- Problem: incubation time of possible contaminants ⇒ Solution: Timely processing (scheduling, laboratory on campus)
- Problem: contamination through laboratory processing ⇒ Solution: Disinfection; sterile workbench; Material change

## General

- Problem: Pre-analytical contamination (sampling, processing, material) ⇒ Solution: negative samples

## Labor methods

- Problem: Sensitivity and specificity of the culture media ⇒ Solution: Blood cultures; Additive for species that are difficult to cultivate
